# Supplementary material for: APOE polymorphisms influence longitudinal lipid trends preceding intracerebral hemorrhage
Source: PubMed Central journal article supplement — Neurol Genet. 2016 Jun 23;2(4):e81. doi: 10.1212/NXG.0000000000000081 (PMC4936477; doi:10.1212/nxg.0000000000000081), 2016-06-23
Supplement: supp_2.4.e81_Table_e-1.pdf [file supp_2.4.e81_Table_e-1.pdf]

## SUPPLEMENTARY DATA

**Table e-1. Baseline characteristics of ICH cohort without *APOE* genotype data**

|                      | Excluded ICH Cohort (n=83) | <i>P</i> Value    |
|----------------------|----------------------------|-------------------|
| Age, y (mean +/- SD) | 73.7+/-12.0                | 0.71 <sup>a</sup> |
| Females, n (%)       | 39 (47.0)                  | 0.67 <sup>b</sup> |
| White, n (%)         | 74 (89.2)                  | 0.67 <sup>b</sup> |
| HTN, n (%)           | 68 (81.9)                  | 0.57 <sup>b</sup> |
| DM, n (%)            | 14 (25.9)                  | 0.07 <sup>b</sup> |
| Alcohol Use, n (%)   | 28 (53.9)                  | 0.87 <sup>b</sup> |
| Smokers, n (%)       | 11 (20.4)                  | 0.16 <sup>b</sup> |
| Statin Use, n (%)    | 39 (47.0)                  | 0.48 <sup>b</sup> |
| Lobar ICH, n (%)     | 39 (47.0)                  | 0.97 <sup>b</sup> |

Comparison of baseline characteristics between excluded vs. included ICH individuals by *APOE* genotype availability. Statistical significance at  $p < 0.05$ , <sup>a</sup> t test, <sup>b</sup> Fisher exact test. Abbreviations: **HTN**, hypertension; **DM**, diabetes mellitus; **ICH**, intracerebral hemorrhage.
